# Supplementary material for: Evaluating the Impact of a Community-Based Empowerment Initiative on Women’s Development in Angola
Source: Research Square preprint supplement (doi:10.21203/rs.3.rs-7603839/v1), 2025-09-26
Supplement: Supplementary file 1 [file 65742b5883b11e5e0c6e06c3.docx]

**Supplementary Information**

**Inquérito Pré-Workshop - Portuguese Version**

1. **Participante ID do estudo**

2. **Qual é a sua faixa etária?**

- 10 - 15 anos
- 16 - 19 anos
- 20 - 25 anos
- 26 - 35 anos
- 36 - 45 anos
- 46 - 55 anos
- 56 anos e mais

3. **Qual é a sua profissão? (selecione apenas uma opção)**

- **Estudante**
- Professora
- Outro (Escreva a sua Profissão)

**Saúde e Higiene Reprodutiva:**

**Com que frequência discutem temas de saúde reprodutiva na vossa comunidade? (selecione apenas uma opção)**

- Raramente
- Ocasionalmente
- Frequentemente
- De modo algum

**Tem atualmente acesso a produtos de higiene, tais como pensos menstruais e sabão? (selecione apenas uma opção)**

- Sim, de fácil acesso
- Sim, mas não facilmente acessível
- Não, não é acessível de todo

**Sente-se à vontade para discutir temas relacionados com a menstruação e a higiene com outras pessoas? ( selecione apenas uma opção)**

- Muito pouco à vontade
- Pouco à vontade
- Neutro
- Confortável
- Muito confortável

**Há alguma área específica da saúde e higiene reprodutiva sobre a qual gostaria de aprender mais?**

**Educação financeira:**

**Sabe o que é a educação financeira? (selecione apenas uma opção)**

- Sim
- Não
- Talvez

**Se sim, defina o que é a educação em suas palavras**

**Já recebeu alguma educação financeira formal anteriormente? ( selecione apenas uma opção)**

- Sim
- Talvez
- Não

**Como classificarias a sua atual literacia financeira? ( selecione apenas uma opção)**

- Muito baixa
- Baixa
- Moderada
- Alta
- Muito elevada

**Quais são os seus principais objectivos financeiros? ( selecione apenas uma opção)**

- Poupar para a educação
- Poupar para os cuidados de saúde
- Poupar para um negócio
- Poupar para a reforma
- Outro (especificar)

**Quais são os maiores desafios financeiros que enfrenta na sua vida quotidiana?**

**Expectativas do Workshop**

**O que é que espera ganhar com a participação neste seminário?**

**Como é que acha que este workshop o vai beneficiar pessoalmente e à sua comunidade?**

**Pre-Workshop Survey - English Version**

1. **Participant Study ID**
2. **What is your age group?**

- 10 – 15 years
- 16 – 19 years
- 20 – 25 years
- 26 – 35 years
- 36 – 45 years
- 46 – 55 years
- 56 years and over

1. **What is your occupation? (Select only one option)**

- Student
- Teacher
- Other (Please specify your occupation)

**Reproductive Health and Hygiene:**

**How often are topics related to reproductive health discussed in your community? (Select only one option)**

- Rarely
- Occasionally
- Frequently
- Not at all

**Do you currently have access to hygiene products such as sanitary pads and soap? (Select only one option)**

- Yes, easily accessible
- Yes, but not easily accessible
- No, not accessible at all

**Do you feel comfortable discussing topics related to menstruation and hygiene with others? (Select only one option)**

- Very uncomfortable
- Uncomfortable
- Neutral
- Comfortable
- Very comfortable

**Is there any specific area of reproductive health and hygiene you would like to learn more about?**

**Financial Education:**

**Do you know what financial education is? (Select only one option)**

- Yes
- No
- Maybe

**If yes, how would you define financial education in your own words?**

**Have you ever received any formal financial education? (Select only one option)**

- Yes
- Maybe
- No

**How would you rate your current financial literacy? (Select only one option)**

- Very low
- Low
- Moderate
- High
- Very high

**What are your main financial goals? (Select only one option)**Saving for education
Saving for healthcare
Saving for a business
Saving for retirement
Other (please specify)

**What are the biggest financial challenges you face in your daily life?**

**Workshop Expectations:**

**What do you hope to gain from participating in this workshop?**

**How do you think this workshop will benefit you personally and your community**

**Inquérito Pós-Workshop - Portuguese Version**

**1. Participante ID do estudo**

**2. Qual é a sua faixa etária? (seleccione apenas uma opção)**

- 10 - 15 anos
- 16 - 19 anos
- 20 - 25 anos
- 26 - 35 anos
- 36 - 45 anos
- 46 - 55 anos
- 56 anos e mais

**3. Qual é a sua profissão? ( selecione apenas uma opção)**

- Estudante
- Professora
- Outro (Escreva a sua Profissão)

**Saúde e Higiene Reprodutiva:**

**Com que frequência discutem temas de saúde reprodutiva na vossa comunidade? ( selecione apenas uma opção)**

- Raramente
- Ocasionalmente
- Frequentemente
- De modo algum

**Tem atualmente acesso a produtos de higiene, tais como pensos menstruais e sabão? ( selecione apenas uma opção)**

- Sim, de fácil acesso
- Sim, mas não facilmente acessível
- Não, não é acessível de todo

**Sente-se à vontade para discutir temas relacionados com a menstruação e a higiene com outras pessoas? ( selecione apenas uma opção)**

- Muito pouco à vontade
- Pouco à vontade
- Neutro
- Confortável
- Muito confortável

**Há alguma área específica da saúde e higiene reprodutiva sobre a qual gostaria de aprender mais?**

**Tenciona implementar algumas das práticas de higiene ou conhecimentos adquiridos no seminário na sua rotina diária? ( selecione apenas uma opção)**

- **Sim, extensivamente**
- Sim, até certo ponto
- Não, ainda não

**Sente-se confiante em discutir tópicos de saúde reprodutiva com outras pessoas depois de participar no workshop? ( selecione apenas uma opção)**

- Aumentou significativamente
- Aumentou moderadamente
- Permaneceu a mesma
- Diminuiu

**Educação financeira:**

Sabe o que é a educação financeira? ( selecione apenas uma opção)

- Sim
- Não
- Talvez

**Se sim, defina o que é a educação em suas palavras**

**Já recebeu alguma educação financeira formal anteriormente? ( selecione apenas uma opção)**

- Sim
- Talvez
- Não

**Como classificarias a sua atual literacia financeira? ( selecione apenas uma opção)**

- Muito baixa
- Baixa
- Moderada
- Alta
- Muito elevada

**Quais são os seus principais objectivos financeiros?( selecione apenas uma opção)**

- Poupar para a educação
- Poupar para os cuidados de saúde
- Poupar para um negócio
- Poupar para a reforma
- Outro (especificar)

**Quais são os maiores desafios financeiros que enfrenta na sua vida quotidiana?**

**Tenciona tomar alguma medida para melhorar a sua situação financeira depois de participar no seminário? ( selecione apenas uma opção)**

- Sim, acções significativas
- Sim, acções menores
- Não, ainda não

**Que estratégias financeiras específicas ou conhecimentos adquiridos no workshop tenciona implementar na sua vida?**

**Como é que a sua compreensão dos conceitos financeiros melhorou em resultado do seminário? ( selecione apenas uma opção)**

- Melhorou significativamente
- Melhorou moderadamente
- Ligeiramente melhorada
- Nenhuma mudança
- Diminuiu

**Expectativas do Workshop:**

**Como classificaria o seminário em geral? ( selecione apenas uma opção)**

- Excelente
- Bom
- Razoável
- Fraco

**O seminário correspondeu às suas expectativas? ( selecione apenas uma opção)**

- Sim, completamente
- Sim, parcialmente
- Não, de modo algum

**Quais os aspectos específicos do seminário que considerou mais importantes?**

**Como é que acha que este workshop o vai beneficiar pessoalmente e à sua comunidade?**

**Estaria interessado em participar em seminários semelhantes no futuro? ( selecione apenas uma opção)**

- Sim, de certeza
- Sim, se forem introduzidas melhorias
- Não, não é necessário
- Não, definitivamente não

**Que tópicos ou áreas adicionais gostaria de ver abordados em futuros seminários?**

**Quaisquer outros comentários ou feedback sobre a experiência do workshop?**

**Post-Workshop Survey – English Version**

1. **Participant Study ID**
2. **What is your age group? (Select only one option)**

- 10 – 15 years
- 16 – 19 years
- 20 – 25 years
- 26 – 35 years
- 36 – 45 years
- 46 – 55 years
- 56 years and over

1. **What is your occupation? (Select only one option)**

- Student
- Teacher
- Other (Please specify your occupation)

**Reproductive Health and Hygiene:**

**How often are topics related to reproductive health discussed in your community? (Select only one option)**

- Rarely
- Occasionally
- Frequently
- Not at all

**Do you currently have access to hygiene products such as sanitary pads and soap? (Select only one option)**

- Yes, easily accessible
- Yes, but not easily accessible
- No, not accessible at all

**Do you feel comfortable discussing topics related to menstruation and hygiene with others? (Select only one option)**

- Very uncomfortable
- Uncomfortable
- Neutral
- Comfortable
- Very comfortable

**Is there any specific area of reproductive health and hygiene you would like to learn more about?**

**Do you intend to implement any of the hygiene practices or knowledge gained from the seminar into your daily routine? (Select only one option)**

- Yes, extensively
- Yes, to some extent
- No, not yet

**Do you feel more confident discussing reproductive health topics with others after attending the workshop? (Select only one option)**

- Significantly increased
- Moderately increased
- Remained the same
- Decreased

**Financial Education:**

**Do you know what financial education is? (Select only one option)**

- Yes
- No
- Maybe

**If yes, how would you define financial education in your own words?**

**Have you previously received any formal financial education? (Select only one option)**

- Yes
- Maybe
- No

**How would you rate your current level of financial literacy? (Select only one option)**

- Very low
- Low
- Moderate
- High
- Very high

**What are your main financial goals? (Select only one option)**

- Saving for education
- Saving for healthcare
- Saving for a business
- Saving for retirement
- Other (please specify)

**What are the biggest financial challenges you face in your daily life?**

**Do you plan to take any steps to improve your financial situation after attending the seminar? (Select only one option)**

- Yes, significant actions
- Yes, small actions
- No, not yet

**What specific financial strategies or knowledge gained from the workshop do you plan to implement in your life?**

**How has your understanding of financial concepts improved as a result of the seminar? (Select only one option)**

- Significantly improved
- Moderately improved
- Slightly improved
- No change
- Worsened

**Workshop Expectations:**

**How would you rate the seminar overall? (Select only one option)**

- Excellent
- Good
- Fair
- Poor

**Did the seminar meet your expectations? (Select only one option)**

- Yes, completely
- Yes, partially
- No, not at all

**Which specific aspects of the seminar did you find most valuable?**

**How do you think this workshop will benefit you personally and your community?**

**Would you be interested in attending similar seminars in the future? (Select only one option)**

- Yes, definitely
- Yes, if improvements are made
- No, not necessary
- No, definitely not

**What additional topics or areas would you like to see covered in future seminars?**

**Any other comments or feedback about your workshop experience?**

**1 Month Follow Up – Portuguese Version**

**1. Participante ID do estudo**

**2. Qual é a sua faixa etária?**

- 10 - 15 anos
- 16 - 19 anos
- 20 - 25 anos
- 26- 35 anos
- 36 - 45 anos
- 46 - 55 anos
- 56 anos e mais

**3. Qual é a sua profissão? ( selecione apenas uma opção)**

- Estudante
- Professora
- Outro (Escreva a sua Profissão)

**Saúde e Higiene Reprodutiva:**

**Depois do Workshop conversaste com as outras meninas/pessoas sobre a sua saúde reprodutiva ou o tópico em geral? ( selecione apenas uma opção)**

- Raramente
- Ocasionalmente
- Frequentemente
- De modo algum

**Achaste os pensos reutilizáveis úteis, práticos e bons? ( selecione apenas uma opção)**

- Sim, uteis, bons e praticos
- Sim, mas praticos
- Não

**Já consegues falar sobre menstruação e a higiene com as outras meninas? ( selecione apenas uma opção)**

- Muito pouco à vontade
- Pouco à vontade
- Neutro
- Confortável
- Muito confortável

**Partilhou alguma das informações ou práticas aprendidas com familiares ou membros da comunidade? ( selecione apenas uma opção)**

- Sim, frequentemente
- Sim, ocasionalmente
- Não, de forma alguma

**Depois do Workshop começaste a tomar notas da cor do sangue ou quantidade da tua menstruação?**

**Conseguiste usar pelo menos uma pratica de higiene ensinada no workshop? ( selecione apenas uma opção)**

- Sim, extensivamente
- Sim, até certo ponto
- Não, ainda não

**Notou alguma melhoria na sua higiene pessoal ou saúde como resultado do seminário? ( selecione apenas uma opção)**

- Sim, melhorias significativas
- Sim, pequenas melhorias
- Nenhuma melhoria

**Educação financeira:**

**Sabe o que é a educação financeira? ( selecione apenas uma opção)**

- Sim
- Não
- Talvez

**Já recebeu alguma educação financeira formal anteriormente? ( selecione apenas uma opção)**

- Sim, se sim quando?
- Não

**Como classificarias a sua atual literacia financeira? ( selecione apenas uma opção)**

- Muito baixa
- Baixa
- Moderada
- Alta
- Muito elevada

**Começou a implementar alguma das estratégias financeiras ou conhecimentos que adquiriu no workshop? ( selecione apenas uma opção)**

- Sim, extensivamente
- Sim, até certo ponto
- Não, ainda não

**Já tentaste criar um orçamento como ensinado no workshop? ( selecione apenas uma opção)**

- Sim
- Não
- Talvez

**Qual é a parte mais difícil para fazer um orçamento para ti?**

**Já consegues entender melhor como poupar ? ( selecione apenas uma opção)**

- Sim
- Talvez
- Não

**Já começaste a fazer planos ou estabelecer metas para poupança? ( selecione apenas uma opção)**

- Sim
- Não
- Talvez

**Consegues identificar quais são os teus desafios para poupar? ( selecione apenas uma opção)**

- Sim, alguns
- Não

**Depois do workshop tiveste interesse em procurar mais informação sobre finança? ( selecione apenas uma opção)**

- Sim
- Não, ainda não
- Não, não tenho interesse

**Já começaste a praticar o consumo consciente (perguntar-se se precisas ou queres na hora de comprar)? ( selecione apenas uma opção)**

- Sim, e estou a melhorar
- Sim, mas nenhuma diferença
- Não

**Como é que a sua capacidade de gerir as suas finanças mudou desde o seminário? ( selecione apenas uma opção)**

- Melhorou significativamente
- Melhorou moderadamente
- Ligeiramente melhorada
- Sem alterações

**Estabeleceu novos objectivos financeiros desde que participou no seminário? ( selecione apenas uma opção)**

- Sim, e estou a trabalhar para os atingir
- Sim, mas ainda não comecei a trabalhar para os atingir
- Não

**De um modo geral, até que ponto considera que o seminário foi benéfico para si pessoalmente? ( selecione apenas uma opção)**

- Extremamente benéfico
- Muito benéfico
- Moderadamente benéfico
- Ligeiramente benéfico
- Não foi benéfico

**Que aspeto do seminário teve o impacto mais significativo em si? ( selecione apenas uma opção)**

- Saúde reprodutiva e higiene
- Educação financeira
- Ambos igualmente
- Nenhum

**Qual foi a informação ou prática mais valiosa que aprendeu no seminário?**

**Impacto na comunidade:**

**Notou alguma mudança positiva na sua comunidade como resultado da partilha do que aprendeu no workshop? ( selecione apenas uma opção)**

- Sim, mudanças significativas
- Sim, algumas mudanças
- Nenhuma mudança

**Outras mulheres da sua comunidade estão interessadas em participar em workshops semelhantes? ( selecione apenas uma opção)**

- Sim, muitas estão interessadas
- Sim, algumas estão interessadas
- Não, nenhuma está interessada

**Conseguiu apoiar ou orientar outras mulheres da sua comunidade utilizando os conhecimentos adquiridos no seminário? ( selecione apenas uma opção)**

- Sim, frequentemente
- Sim, ocasionalmente
- Não, de forma alguma

**Feedback e Workshops Futuros:**

**Que tópicos ou áreas adicionais gostaria de ver abordados em futuros workshops?**

**Participaria noutro seminário organizado pela mesma organização? ( selecione apenas uma opção)**

- Sim, definitivamente
- Sim, se forem feitas melhorias
- Não, não é necessário
- Não, definitivamente não

**Mais algum comentário ou feedback sobre o seminário e o seu impacto na sua vida?**

**Qual foi o impacto do seminário e do dia de aprendizagem?**

**Quaisquer outros comentários ou feedback sobre a experiência do workshop?**

**1-Month Follow-Up – English Version**

1. **Participant Study ID**
2. **What is your age group?**

- 10 – 15 years
- 16 – 19 years
- 20 – 25 years
- 26 – 35 years
- 36 – 45 years
- 46 – 55 years
- 56 years and over

1. **What is your occupation? (Select only one option)**

- Student
- Teacher
- Other (Please specify your occupation)

**Reproductive Health and Hygiene:**

**After the workshop, did you talk to other girls/people about your reproductive health or the topic in general? (Select only one option)**

- Rarely
- Occasionally
- Frequently
- Not at all

**Did you find the reusable pads useful, practical, and good? (Select only one option)**

- Yes – useful, good and practical
- Yes – but only practical
- No

**Do you now feel comfortable talking about menstruation and hygiene with other girls? (Select only one option)**

- Very uncomfortable
- Uncomfortable
- Neutral
- Comfortable
- Very comfortable

**Did you share any of the information or practices learned with family members or people in your community? (Select only one option)**

- Yes, frequently
- Yes, occasionally
- No, not at all

**After the workshop, did you start taking note of the colour or amount of your menstrual blood?**

**Were you able to apply at least one hygiene practice taught in the workshop? (Select only one option)**

- Yes, extensively
- Yes, to some extent
- No, not yet

**Have you noticed any improvements in your personal hygiene or health as a result of the seminar? (Select only one option)**

- Yes, significant improvements
- Yes, minor improvements
- No improvement

**Financial Education:**

**Do you know what financial education is? (Select only one option)**

- Yes
- No
- Maybe

**Have you previously received any formal financial education? (Select only one option)**

- Yes – if yes, when?
- No

**How would you rate your current level of financial literacy? (Select only one option)**

- Very low
- Low
- Moderate
- High
- Very high

**Have you started applying any of the financial strategies or knowledge you gained from the workshop? (Select only one option)**

- Yes, extensively
- Yes, to some extent
- No, not yet

**Have you tried creating a budget as taught in the workshop? (Select only one option)**

- Yes
- No
- Maybe

**What is the most difficult part of budgeting for you?**

**Do you now better understand how to save money? (Select only one option)**

- Yes
- Maybe
- No

**Have you started making plans or setting savings goals? (Select only one option)**

- Yes
- No
- Maybe

**Can you identify what challenges you face when trying to save? (Select only one option)**

- Yes, some
- No

**After the workshop, did you feel motivated to look for more information about finances? (Select only one option)**

- Yes
- No, not yet
- No, not interested

**Have you started practising conscious spending (asking yourself if you need or just want something before buying)? (Select only one option)**

- Yes, and I’m improving
- Yes, but no difference so far
- No

**How has your ability to manage your finances changed since the seminar? (Select only one option)**

- Significantly improved
- Moderately improved
- Slightly improved
- No change

**Have you set any new financial goals since attending the seminar? (Select only one option)**

- Yes, and I am working towards them
- Yes, but I haven’t started working on them yet
- No

**Overall, how beneficial do you feel the seminar has been for you personally? (Select only one option)**

- Extremely beneficial
- Very beneficial
- Moderately beneficial
- Slightly beneficial
- Not beneficial

**Which aspect of the seminar had the greatest impact on you? (Select only one option)**

- Reproductive health and hygiene
- Financial education
- Both equally
- Neither

**What was the most valuable information or practice you learned during the seminar?**

**Impact on the Community:**

**Have you noticed any positive changes in your community as a result of sharing what you learned from the workshop? (Select only one option)**

- Yes, significant changes
- Yes, some changes
- No changes

**Are other women in your community interested in attending similar workshops? (Select only one option)**

- Yes, many are interested
- Yes, some are interested
- No, none are interested

**Have you been able to support or guide other women in your community using the knowledge gained from the seminar? (Select only one option)**

- Yes, frequently
- Yes, occasionally
- No, not at all

**Feedback and Future Workshops:**

**What additional topics or areas would you like to see covered in future workshops?**

**Would you attend another seminar organised by the same organisation? (Select only one option)**

- Yes, definitely
- Yes, if improvements are made
- No, not necessary
- No, definitely not

**Any further comments or feedback about the seminar and its impact on your life?**

**What was the impact of the seminar and the learning day?**

**Any other comments or feedback about your workshop experience?**
